# Supplementary material for: Voluntary Wheel Running in Old C57BL/6 Mice Reduces Age-Related Inflammation in the Colon but Not in the Brain
Source: MDPI journal article supplement (doi:10.3390/cells11030566), 2022-02-06
Supplement: s1 [file s1]

**Table S1: Primers for qPCR**

| Gene                      | Primer sequence listed fw/rev (5'-3') or published [PMID for PubMed] | Genbank Accession Number | Product length [bp] | Start position |            |
|---------------------------|----------------------------------------------------------------------|--------------------------|---------------------|----------------|------------|
|                           |                                                                      |                          |                     | Fw Primer      | Rev Primer |
| <i>Adgre1 (F4/80)</i>     | 24796813                                                             | NM_010130.4              | 164                 | 905            | 1068       |
| <i>Ccl2</i>               | 23301011                                                             | NM_011333.3              | 90                  | 257            | 346        |
| <i>Ccl3</i>               | 23301011                                                             | NM_011337.2              | 122                 | 364            | 485        |
| <i>Cd68</i>               | 23301011                                                             | NM_001291058.1           | 116                 | 847            | 962        |
| <i>Cdh1</i>               | ATCGCCACAGATGATGGTTC<br>CAGTAAAGGGGGACGTGTTG                         | NM_009864.3              | 187                 | 1847           | 2033       |
| <i>Cldn1</i>              | AGGTCTGGCGACATTAGTGG<br>AAGAGGGCCTGGCCAAATTC                         | NM_016674.4              | 111                 | 600            | 710        |
| <i>Gapdh</i>              | 22028848                                                             | NM_001289726.1           | 164                 | 944            | 1107       |
| <i>Gfap</i>               | 24796813                                                             | NM_001131020.1           | 176                 | 636            | 811        |
| <i>Hmbs</i>               | 33782119                                                             | NM_013551.2              | 106                 | 1132           | 1237       |
| <i>Iba1 (Aif)</i>         | 23301011                                                             | NM_001361501.1           | 146                 | 478            | 623        |
| <i>Ifng</i>               | CAGCAACAACATAAGCGTCATT<br>GTTGACCTCAAACCTGGCAATAC                    | NM_008337.4              | 106                 | 370            | 475        |
| <i>Il10</i>               | 22028848                                                             | NM_010548.2              | 98                  | 990            | 1087       |
| <i>Il1ra</i>              | CTTCTTCCTCATTTCTGGGTA<br>TGGGTTGTTTTACTTGTTG                         | NM_031167                | 98                  | 2021           | 2118       |
| <i>Il1a</i>               | 22028848                                                             | NM_010554.4              | 158                 | 879            | 1036       |
| <i>Il1b (Colon)</i>       | ATGCCACCTTTTGACAGTGATG<br>ATGTGCTGCTGCGAGATTTG                       | NM_008361.4              | 137                 | 118            | 254        |
| <i>Il1b (Hippocampus)</i> | 22028848                                                             | NM_008361.4              | 96                  | 382            | 477        |
| <i>Il6</i>                | GGGAAATCGTGGAATGAGA<br>TCCAGTTTGGTAGCATCCATC                         | NM_031168.2              | 131                 | 257            | 387        |
| <i>Itgam (Cd11b)</i>      | AACCTCACGGCTTCAGAGATG<br>AGGCACTTGAGAGGTTCTGG                        | NM_001082960             | 175                 | 2927           | 3101       |
| <i>Muc2</i>               | TGATTGTGTTTCAGGCTCCA<br>GACAGCAGAGCAAGGGACTC                         | NM_023566.4              | 94                  | 13358          | 13451      |
| <i>Ocln</i>               | TCGGTACAGCAGCAATGGTA<br>GATATCCCTGACCCAGTCCT                         | NM_008756.2              | 164                 | 1274           | 1437       |
| <i>P2rx7</i>              | AAGAAGTTCCAAGACCCAGAT<br>TTTCCTCAGATTGTCCAGGAGT                      | NM_011027.4              | 96                  | 1427           | 1522       |
| <i>S100b</i>              | CTTCCTTGCTCCCTCTGCT<br>CGACTCTCAGCCTCACCAA                           | NM_009115.3              | 171                 | 1199           | 1369       |
| <i>Tjp1</i>               | AAAGCTGTCCCTGTGAGTCC<br>GAATGGCTCCTTGTTGGGATA                        | NM_009386.2              | 157                 | 5233           | 5389       |
| <i>Tnf</i>                | 22028848                                                             | NM_013693.3              | 102                 | 313            | 414        |

sorted alphabetically

**Table S2: Gene selection criteria**

|                        | Gene                                         | Gene selection criteria [ <i>PMID for PubMed</i> ]                                                                                                         | Database link                                                                                                     |
|------------------------|----------------------------------------------|------------------------------------------------------------------------------------------------------------------------------------------------------------|-------------------------------------------------------------------------------------------------------------------|
| Cytokines & Chemokines | <i>Tnf</i>                                   | Upregulation in hippocampus of 24 vs. 5 months old male C57BL/6 mice [24796813]                                                                            | <a href="http://www.informatics.jax.org/marker/MGI:104798">http://www.informatics.jax.org/marker/MGI:104798</a>   |
|                        | <i>Ifng</i>                                  | Upregulation in whole brain of 24-26 vs. 2 months old female BALB/c mice [10805375]                                                                        | <a href="http://www.informatics.jax.org/marker/MGI:107656">http://www.informatics.jax.org/marker/MGI:107656</a>   |
|                        | <i>Il1a</i>                                  | Upregulation in hippocampus of 24 vs. 5 months old male C57BL/6 mice [24796813]                                                                            | <a href="http://www.informatics.jax.org/marker/MGI:96542">http://www.informatics.jax.org/marker/MGI:96542</a>     |
|                        | <i>Il1b</i>                                  | Upregulation in hippocampus of 24 vs. 5 months old male C57BL/6 mice [24796813]                                                                            | <a href="http://www.informatics.jax.org/marker/MGI:96543">http://www.informatics.jax.org/marker/MGI:96543</a>     |
|                        | <i>Il6</i>                                   | Upregulation in whole brain of 24 vs. 6 months old male BALB/c mice [11431008]                                                                             | <a href="http://www.informatics.jax.org/marker/MGI:96559">http://www.informatics.jax.org/marker/MGI:96559</a>     |
|                        | <i>Il10</i>                                  | Downregulation in hippocampus of 24 vs 3 months old male rats [15890435]                                                                                   | <a href="http://www.informatics.jax.org/marker/MGI:96537">http://www.informatics.jax.org/marker/MGI:96537</a>     |
|                        | <i>Il1ra</i> ( <i>Il1rn</i> )                | Antagonist of Il1 [19258032]                                                                                                                               | <a href="http://www.informatics.jax.org/marker/MGI:96547">http://www.informatics.jax.org/marker/MGI:96547</a>     |
|                        | <i>Ccl2</i>                                  | Higher serum Ccl2 protein in 26 vs. 2 months old female C57BL/6 mice [27069796]                                                                            | <a href="http://www.informatics.jax.org/marker/MGI:98259">http://www.informatics.jax.org/marker/MGI:98259</a>     |
|                        | <i>Ccl3</i>                                  | Upregulation in hippocampus of 24 vs. 5 months old male C57BL/6 mice [24796813]                                                                            | <a href="http://www.informatics.jax.org/marker/MGI:98260">http://www.informatics.jax.org/marker/MGI:98260</a>     |
| Astrocytes             | <i>Gfap</i>                                  | Upregulation in hippocampus of 24 vs. 5 months old male C57BL/6 mice [24796813], mainly expressed in astrocytes and enteric glia cells [25975510]          | <a href="http://www.informatics.jax.org/marker/MGI:95697">http://www.informatics.jax.org/marker/MGI:95697</a>     |
|                        | <i>S100b</i>                                 | Upregulation in cerebral cortex in 16 vs. 5 months old male albino mice [20099023], expressed in astrocytes (less specific) [17199889]                     | <a href="http://www.informatics.jax.org/marker/MGI:98217">http://www.informatics.jax.org/marker/MGI:98217</a>     |
| Microglia              | <i>Iba1</i> ( <i>Aif1</i> )                  | Upregulation in hippocampus of 24 vs. 5 months old male C57BL/6 mice [24796813], expressed in microglia [32848611]                                         | <a href="http://www.informatics.jax.org/marker/MGI:1343098">http://www.informatics.jax.org/marker/MGI:1343098</a> |
|                        | <i>Adgre1</i> ( <i>Emr1</i> , <i>F4/80</i> ) | Upregulation in hippocampus of 24 vs. 5 months old male C57BL/6 mice [24796813], expressed in microglia [32848611]                                         | <a href="http://www.informatics.jax.org/marker/MGI:106912">http://www.informatics.jax.org/marker/MGI:106912</a>   |
|                        | <i>Cd68</i>                                  | Upregulation in hippocampus of 24 vs. 5 months old male C57BL/6 mice [24796813], expressed in microglia [32848611]                                         | <a href="http://www.informatics.jax.org/marker/MGI:88342">http://www.informatics.jax.org/marker/MGI:88342</a>     |
|                        | <i>Itgam</i> ( <i>Cd11b</i> )                | Protein upregulated in hippocampus of 21 vs. 4 months old female C57BL/6 mice [22155499], expressed in microglia [32848611]                                | <a href="http://www.informatics.jax.org/marker/MGI:96607">http://www.informatics.jax.org/marker/MGI:96607</a>     |
|                        | <i>P2rx7</i>                                 | Modulates neuroinflammatory processes and has role in CNS diseases as reviewed here [32848594], expressed in diverse tissues and cells, such as microglia, | <a href="http://www.informatics.jax.org/marker/MGI:1339957">http://www.informatics.jax.org/marker/MGI:1339957</a> |

|                             |                       |                                                                                                                                  |                                                                                                                   |
|-----------------------------|-----------------------|----------------------------------------------------------------------------------------------------------------------------------|-------------------------------------------------------------------------------------------------------------------|
|                             |                       | oligodendrocytes, Schwann cells, and possibly in astrocytes and neurons [32848594]; highly expressed in microglia [28716092]     |                                                                                                                   |
| Intestinal barrier function | <i>Ocln</i>           | Involved in gut barrier function [19855405], downregulation in ileum of 24 vs 12 months old male rats [24243034]                 | <a href="http://www.informatics.jax.org/marker/MGI:106183">http://www.informatics.jax.org/marker/MGI:106183</a>   |
|                             | <i>Cdh1</i>           | Involved in gut barrier function [19855405]                                                                                      | <a href="http://www.informatics.jax.org/marker/MGI:88354">http://www.informatics.jax.org/marker/MGI:88354</a>     |
|                             | <i>Tjp1</i><br>(ZO-1) | Involved in gut barrier function [19855405], downregulation in ileum of 24 vs 12 months old male rats [24243034]                 | <a href="http://www.informatics.jax.org/marker/MGI:98759">http://www.informatics.jax.org/marker/MGI:98759</a>     |
|                             | <i>Cldn1</i>          | Involved in gut barrier function [19855405]                                                                                      | <a href="http://www.informatics.jax.org/marker/MGI:1276109">http://www.informatics.jax.org/marker/MGI:1276109</a> |
|                             | <i>Muc2</i>           | Involved in gut barrier function [19855405], reduced colonic mucus thickness in 19 vs. 2 months old male C57BL/6 mice [30723224] | <a href="http://www.informatics.jax.org/marker/MGI:1339364">http://www.informatics.jax.org/marker/MGI:1339364</a> |

**Table S3: Gene Ontology results for significantly differentially expressed genes stratified by experiment type and tissue.**

Only significant results according to uncorrected p-value were reported for colon while the top 5 hits were reported for HC. Query ratio indicates the number of genes found for a GO-term in relation to the size of the input gene list. Background ratio gives the number of all tested genes which belong to a certain GO biological process in relation to all tested genes. The size of the background gene sets was 16 for HC and 21 for colon.

| Tissue      | Experiment | Change              | Gene Ontology ID | Involved Genes                | Description                                                                               | Query Ratio | Background Ratio | P-value | P-adjusted |
|-------------|------------|---------------------|------------------|-------------------------------|-------------------------------------------------------------------------------------------|-------------|------------------|---------|------------|
| Hippocampus | Aging      | increased (old)     | GO:0006911       | <i>Iba1, Itgam</i>            | phagocytosis, engulfment                                                                  | 2/7         | 2/16             | 0.175   | 0.99       |
|             |            |                     | GO:0010575       | <i>Il1a, Il6</i>              | positive regulation of vascular endothelial growth factor production                      | 2/7         | 3/16             | 0.400   | 0.99       |
|             |            |                     | GO:0048661       | <i>Il6, Iba1</i>              | positive regulation of smooth muscle cell proliferation                                   | 2/7         | 3/16             | 0.400   | 0.99       |
|             |            |                     | GO:0001781       | <i>Il6, Itgam</i>             | neutrophil apoptotic process                                                              | 2/7         | 3/16             | 0.400   | 0.99       |
|             |            |                     | GO:0008284       | <i>Il6, S100b, Iba1</i>       | positive regulation of cell population proliferation                                      | 3/7         | 6/16             | 0.549   | 0.99       |
| Colon       | Aging      | increased (old)     | GO:0043410       | <i>Tnf, Il6, P2rx7</i>        | positive regulation of MAPK cascade                                                       | 3/4         | 3/21             | 0.003   | 0.22       |
|             |            |                     | GO:0051384       | <i>Tnf, Il6, Il1ra</i>        | response to glucocorticoid                                                                | 3/4         | 4/21             | 0.012   | 0.22       |
|             |            |                     | GO:0006954       | <i>Tnf, Il6, Il1ra, P2rx7</i> | inflammatory response                                                                     | 4/4         | 8/21             | 0.012   | 0.22       |
|             |            |                     | GO:0032731       | <i>Tnf, Il6, P2rx7</i>        | positive regulation of interleukin-1 beta production                                      | 3/4         | 5/21             | 0.028   | 0.22       |
|             |            |                     | GO:2000660       | <i>Il6, Il1ra</i>             | negative regulation of interleukin-1-mediated signaling pathway                           | 2/4         | 2/21             | 0.029   | 0.22       |
|             |            |                     | GO:0045837       | <i>Il6, Il1ra</i>             | negative regulation of membrane potential                                                 | 2/4         | 2/21             | 0.029   | 0.22       |
|             |            |                     | GO:0006953       | <i>Il6, Il1ra</i>             | acute-phase response                                                                      | 2/4         | 2/21             | 0.029   | 0.22       |
|             |            |                     | GO:0045779       | <i>Il6, P2rx7</i>             | negative regulation of bone resorption                                                    | 2/4         | 2/21             | 0.029   | 0.22       |
|             |            |                     | GO:0060664       | <i>Tnf, Il6</i>               | epithelial cell proliferation involved in salivary gland morphogenesis                    | 2/4         | 2/21             | 0.029   | 0.22       |
|             |            |                     | GO:1904996       | <i>Tnf, Il6</i>               | positive regulation of leukocyte adhesion to vascular endothelial cell                    | 2/4         | 2/21             | 0.029   | 0.22       |
|             |            |                     | GO:1900017       | <i>Tnf, Il6</i>               | positive regulation of cytokine production involved in inflammatory response              | 2/4         | 2/21             | 0.029   | 0.22       |
|             |            |                     | GO:0043154       | <i>Tnf, Il6</i>               | negative regulation of cysteine-type endopeptidase activity involved in apoptotic process | 2/4         | 2/21             | 0.029   | 0.22       |
|             |            |                     | GO:0033138       | <i>Tnf, Il6</i>               | positive regulation of peptidyl-serine phosphorylation                                    | 2/4         | 2/21             | 0.029   | 0.22       |
|             |            |                     | GO:0051897       | <i>Tnf, Il6</i>               | positive regulation of protein kinase B signaling                                         | 2/4         | 2/21             | 0.029   | 0.22       |
|             |            |                     | GO:0042127       | <i>Tnf, Il6</i>               | regulation of cell population proliferation                                               | 2/4         | 2/21             | 0.029   | 0.22       |
|             |            |                     | GO:0010033       | <i>Tnf, P2rx7</i>             | response to organic substance                                                             | 2/4         | 2/21             | 0.029   | 0.22       |
| Colon       | VWR        | decreased (runners) | GO:0090026       | <i>Ccl2, Iba1</i>             | positive regulation of monocyte chemotaxis                                                | 2/5         | 2/21             | 0.048   | 0.56       |
|             |            |                     | GO:0006874       | <i>Ccl2, S100b</i>            | cellular calcium ion homeostasis                                                          | 2/5         | 2/21             | 0.048   | 0.56       |
|             |            |                     | GO:0048662       | <i>Ifng, Iba1</i>             | negative regulation of smooth muscle cell proliferation                                   | 2/5         | 2/21             | 0.048   | 0.56       |
|             |            |                     | GO:1904783       | <i>Ifng, Ccl2</i>             | positive regulation of NMDA glutamate receptor activity                                   | 2/5         | 2/21             | 0.048   | 0.56       |
|             |            |                     | GO:0051770       | <i>Ifng, Ccl2</i>             | positive regulation of nitric-oxide synthase biosynthetic process                         | 2/5         | 2/21             | 0.048   | 0.56       |
|             |            |                     | GO:2000273       | <i>Ifng, Il10</i>             | positive regulation of signaling receptor activity                                        | 2/5         | 2/21             | 0.048   | 0.56       |
|             |            |                     | GO:0045348       | <i>Ifng, Il10</i>             | positive regulation of MHC class II biosynthetic process                                  | 2/5         | 2/21             | 0.048   | 0.56       |
|             |            |                     | GO:0001938       | <i>Il10, Ccl2</i>             | positive regulation of endothelial cell proliferation                                     | 2/5         | 2/21             | 0.048   | 0.56       |
|             |            |                     | GO:0043524       | <i>Il10, Ccl2</i>             | negative regulation of neuron apoptotic process                                           | 2/5         | 2/21             | 0.048   | 0.56       |
